# Supplementary material for: A Novel Treatment of the Josephson Effect
Source: Preprints.org preprint supplement (doi:10.20944/preprints202102.0130.v1), 2021-02-04
Supplement: Supplementary file 2 [file supplementary]

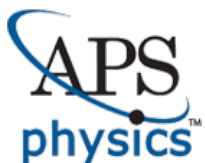

# American Physical Society Reuse and Permissions License

30-Jan-2021

This license agreement between the American Physical Society ("APS") and jacob szeptel ("You") consists of your license details and the terms and conditions provided by the American Physical Society and SciPris.

## Licensed Content Information

**License Number:** RNP/21/JAN/035815  
**License date:** 30-Jan-2021  
**DOI:** 10.1103/PhysRevLett.11.80  
**Title:** Josephson Currents in Superconducting Tunneling: The Effect of Microwaves and Other Observations  
**Author:** Sidney Shapiro  
**Publication:** Physical Review Letters  
**Publisher:** American Physical Society  
**Cost:** USD \$ 0.00

## Request Details

**Does your reuse require significant modifications:** No  
**Specify intended distribution locations:** Worldwide  
**Reuse Category:** Reuse in a journal/magazine  
**Requestor Type:** Publisher, not for profit  
**Items for Reuse:** Figures/Tables  
**Number of Figure/Tables:** 2  
**Figure/Tables Details:** figs.1,3  
**Format for Reuse:** Electronic

## Information about New Publication:

**Publisher:** canadian science publishing  
**Publication:** canadian journal of physics  
**Publication Date:** Dec. 2021  
**Article Title:** A Novel Treatment of the Josephson Effect  
**Author(s):** Jacob Szeptel, Nicolas Sandeau and {Michel Abou Ghantou

## License Requestor Information

**Name:** jacob szeptel  
**Affiliation:** Individual  
**Email Id:** jszeptel@lpqm.ens-cachan.fr  
**Country:** France

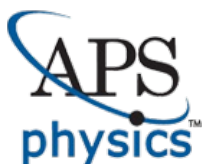

# American Physical Society Reuse and Permissions License

## TERMS AND CONDITIONS

The American Physical Society (APS) is pleased to grant the Requestor of this license a non-exclusive, non-transferable permission, limited to Electronic format, provided all criteria outlined below are followed.

1. You must also obtain permission from at least one of the lead authors for each separate work, if you haven't done so already. The author's name and affiliation can be found on the first page of the published Article.
2. For electronic format permissions, Requestor agrees to provide a hyperlink from the reprinted APS material using the source material's DOI on the web page where the work appears. The hyperlink should use the standard DOI resolution URL, <http://dx.doi.org/{DOI}>. The hyperlink may be embedded in the copyright credit line.
3. For print format permissions, Requestor agrees to print the required copyright credit line on the first page where the material appears: "Reprinted (abstract/excerpt/figure) with permission from [(FULL REFERENCE CITATION) as follows: Author's Names, APS Journal Title, Volume Number, Page Number and Year of Publication.] Copyright (YEAR) by the American Physical Society."
4. Permission granted in this license is for a one-time use and does not include permission for any future editions, updates, databases, formats or other matters. Permission must be sought for any additional use.
5. Use of the material does not and must not imply any endorsement by APS.
6. APS does not imply, purport or intend to grant permission to reuse materials to which it does not hold copyright. It is the requestor's sole responsibility to ensure the licensed material is original to APS and does not contain the copyright of another entity, and that the copyright notice of the figure, photograph, cover or table does not indicate it was reprinted by APS with permission from another source.
7. The permission granted herein is personal to the Requestor for the use specified and is not transferable or assignable without express written permission of APS. This license may not be amended except in writing by APS.
8. You may not alter, edit or modify the material in any manner.
9. You may translate the materials only when translation rights have been granted.
10. APS is not responsible for any errors or omissions due to translation.
11. You may not use the material for promotional, sales, advertising or marketing purposes.
12. The foregoing license shall not take effect unless and until APS or its agent, Aptara, receives payment in full in accordance with Aptara Billing and Payment Terms and Conditions, which are incorporated herein by reference.
13. Should the terms of this license be violated at any time, APS or Aptara may revoke the license with no refund to you and seek relief to the fullest extent of the laws of the USA. Official written notice will be made using the contact information provided with the permission request. Failure to receive such notice will not nullify revocation of the permission.
14. APS reserves all rights not specifically granted herein.
15. This document, including the Aptara Billing and Payment Terms and Conditions, shall be the entire agreement between the parties relating to the subject matter hereof.
