# Supplementary material for: A Novel Treatment of the Josephson Effect
Source: Preprints.org preprint supplement (doi:10.20944/preprints202102.0130.v1), 2021-02-04
Supplement: Supplementary file 3 [file supplementary]

Archive with 2 entries (2 files):
- fig2.pdf
- figs3,6.pdf
